# Supplementary material for: Biomarkers and diatoms as tracers of past sea ice conditions and phytoplankton communities in the southwestern Ross Sea, Antarctica: drivers and variability over the last 200 years
Source: Copernicus journal article supplement (doi:10.5194/egusphere-2025-5553), 2025-12-08
Supplement: Supplementary file 1 [file Biomarker sediment paper_supplementary materials_EdJ.pdf › Biomarker sediment paper_supplementary materials_EdJ.pdf]

# **Supplement for: Biomarkers and diatoms as tracers of past sea ice conditions and phytoplankton communities in the southwestern Ross Sea, Antarctica: drivers and variability over the last 200 years**

5 Emma M. de Jong<sup>1</sup>, Xavier Crosta<sup>2</sup>, Sebastian Naeher<sup>3,a</sup>, Bella Duncan<sup>1,4</sup>, Johan Etourneau<sup>2</sup>, Jae Il Lee<sup>5</sup>, Robert McKay<sup>1</sup>, V. Holly L. Winton<sup>1\*</sup>

<sup>1</sup>Antarctic Research Centre, Victoria University of Wellington, Wellington, 6021, New Zealand

<sup>2</sup>University of Bordeaux, CNRS, Bordeaux INP, UMR 5805 EPOC, Pessac, France

<sup>3</sup>School of Geography, Environment and Earth Sciences, Victoria University of Wellington, Wellington, 6021, New Zealand

<sup>4</sup>Earth Sciences New Zealand, Lower Hutt, 5010, New Zealand

10 <sup>5</sup>Korea Polar Research Institute, Incheon 21990, Republic of Korea

<sup>a</sup>now at: Department of Soil and Physical Sciences, Lincoln University, Lincoln, 7647, New Zealand

*Correspondence to:* V. Holly L. Winton ([holly.winton@vuw.ac.nz](mailto:holly.winton@vuw.ac.nz))

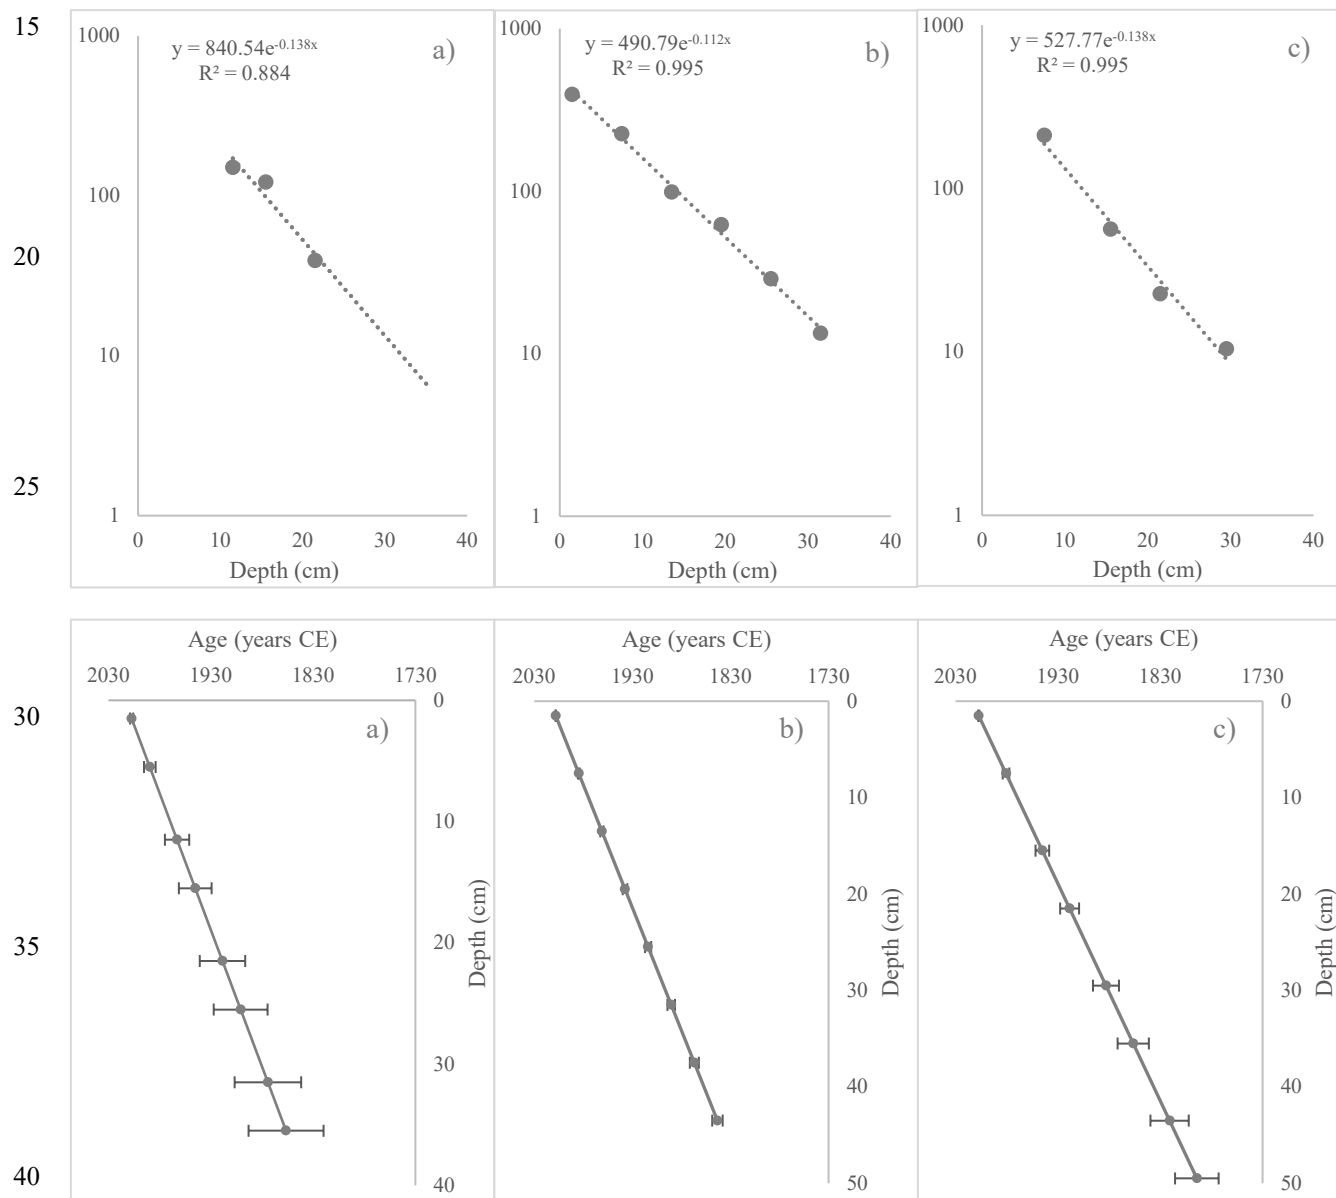

**Supplementary Figure 1: Lead dating age-depth models for a) BC02, b) BC03, c) BC04, and d) BC04 with Radiocarbon age. Top: Sedimentation rates were calculated from the least-squares fit slope of  $^{210}\text{Po}_{\text{Supported}}$  on a logarithmic scale against depth (Appleby, 2001). Bottom: The constant flux and constant sedimentation rate (CFCS) model was applied to determine sediment ages. Errors were estimated using R package ‘serac’ (Bruehl et al., 2020).**
