# Supplementary material for: Biomarkers and diatoms as tracers of past sea ice conditions and phytoplankton communities in the southwestern Ross Sea, Antarctica: drivers and variability over the last 200 years
Source: Copernicus journal article supplement (doi:10.5194/egusphere-2025-5553), 2025-12-08
Supplement: Supplementary file 1 [file Pangea Submission.xlsx]

## Sheet: Info
General information concerning data submissions to PANGAEA
Please follow our Authors Guides (https://wiki.pangaea.de/wiki/Data_submission)
Submit data early on, ideally before manuscript submission.
Submit your data here: https://pangaea.de/submit/
Provide detailed metadata, because PANGAEA data publications are generally publications that stand on their own.
Please complete and submit the campaign (if any), events, parameters and data table included in this template.
If applicable, attach the cruise report of associated research campaigns to your submission.
Each submitted data table requires one unique title and abstract. Please use the "File description" box of the submission form to provide multiple titles and abstracts if you wish to archive multiple data tables.
For more information see: https://pangaea.de/Abstract
To increase citability and allowing the cross-link between data and journal publication, cite the data in your article publication as part of the reference list, including the DOI, e.g. as "Roe, J; Doe, J R (2023): Macro and megafauna abundance during the WARM Arctic expedition in summer 2020 counted using drones. PANGAEA, https://doi.org/10.1594/PANGAEA.11100"

## Sheet: Event table
LabelEvent	Campaign	Area	Device	DateTimeEvent	LatitudeEvent	LongitudeEvent
RS14-BC02	ANA04C Voyage	Southwestern Ross Sea	Box corer	2014-02-01	-76.8449	163.844
RS14-BC03	ANA04C Voyage	Southwestern Ross Sea	Box corer	2014-02-01	-76.0833	163.217
RS14-BC04	ANA04C Voyage	Southwestern Ross Sea	Box corer	2014-02-01	-75.948	163
RS15-GC72	ANA05B Voyage	Southwestern Ross Sea	Gravity corer	2015-02-01	-77.2454	164.563
RS15-GC78	ANA05B Voyage	Southwestern Ross Sea	Gravity corer	2015-02-01	-76.2553	163.476
RS15-GC80	ANA05B Voyage	Southwestern Ross Sea	Gravity corer	2015-02-01	-76.8033	163.927

## Sheet: Data table
Event label	Depth, sediment, top (cm)	Depth, sediment, bottom (cm)	Polonium-210 (Bq/kg)	Polonium-210 (Bq/kg) Error ±	Age (years CE)	Age (years CE) Error ±	Total organic carbon (%)	Total nitrogen (%)	Diatom abundance (106 v gdw−1)	Actinocyclus actinochilus (%)	Actinocyclus curvatulus (%)	Actinocyclus cf. ehrenbergii (%)	Actinocyclus sp. (%)	Asteromphalus hookeri (%)	Asteromphalus hyalinus (%)	Asteromphalus parvalus (%)	Centric sp. (%)	Chaetoceros atlantica (%)	Chaetoceros bulbosum (%)	Chaetoceros cryophilum (%)	Chaetoceros resting spores (%)	Cocconeis fasciolata (%)	Corethron cryophilum (%)	Coscinodiscus oculus-iridis (%)	Coscinodiscus sp. (%)	Eucampia antartica var. intermedia (%)	Eucampia antarctica var. terminalis (%)	Entomoneis sp. (%)	Fragilariopsis curta (%)	Fragilariopsis cylindrus (%)	Fragilariopsis cryophilic (%)	Fragilariopsis kerguelensis (%)	Fragilariopsis obliquecostata (%)	Fragilariopsis rhombica (%)	Fragilariopsis ritscheri (%)	Fragilariopsis separanda (%)	Fragilariopsis sublinearis (%)	Fragilariopsis vanheurckii (%)	Navicula directa (%)	Nitzschia stellata (%)	Odontella weissflogii (%)	Pleurosigma directum (%)	Porosira glacialis (%)	Proboscia pseudodenticulata (%)	Proboscia alata (%)	Proboscia truncata (%)	Proboscia inermis (%)	Proboscia sp. (%)	Pseudo-nitzschia lineola (%)
RS14-BC02	1	2	219	13	2007	1.5	1.65747	0.237989	285.3	0.35	0	0	0	0.2	0.1	0.25	0	0	0.1	0	21.2	0	0.35	0	0	0.95	0.5	1.35	49.25	0.85	2.25	0.2	1.5	1	0.95	0.2	0.85	0.1	0.25	0.95	0	0.35	1.1	0	0	0	0	0	0
RS14-BC02	5	6	185	12	1990	5.7	1.69813	0.241181	281.826	0.4	0	0.1	0	0.5	0.15	0.45	0.1	0.25	0	0	21.25	0	0.25	0	0	0.7	0.35	0.7	46.05	1.1	2.55	0.25	1.45	1.5	0.6	0.5	1.05	0	0.25	0.4	0.1	0.35	0.6	0.1	0	0	0	0.15	0.1
RS14-BC02	11	12	230	14	1963	11.9	1.61729	0.233292	251.199	0.2	0	0	0	0.5	0	0.2	0.2	0	0.2	0	21.1	0	0.2	0	0	1.2	0.5	1.2	50.6	0	1.7	0.2	1.2	1.2	0.7	0	0.7	0	0.2	0.5	0	0	0.2	0	0	0	0	0.2	0
RS14-BC02	15	16	201	13	1945	16	1.75481	0.241451	323.203	0.4	0.4	0	0	0.2	0	0.2	0	0	0.2	0	17.3	0.2	0.5	0.2	0	1.3	0.2	1.1	46.2	0.2	3.6	0.6	2.1	2.3	0.6	0.2	1.5	0	0.4	1.5	0	0.2	1.3	0	0	0.2	0	0.2	0
RS14-BC02	21	22	118.5	8.4	1919	22	2.06416	0.245963	275.9	0.5	0	0	0	0	0.2	0.2	0	0	0	0	19.6	0	0.2	0.2	0	0.5	0.2	4.2	47.6	0.7	3.1	0.2	1.9	0.9	0.7	0.2	0.7	0	0	0.2	0	0.2	0.7	0	0	0	0.2	0	0
RS14-BC02	25	26	55	4.4	1901	26.3	2.18635	0.261316	302.116	0.2	0	0	0	0.2	0.2	0.2	0	0.4	0	0	23.2	0	0.4	0	0	1.3	0.2	1.7	48.7	2.4	1.9	0	0.6	1.3	1.5	0.4	0.2	0	0	1.7	0	0.2	0.2	0	0	0.2	0	0	0
RS14-BC02	31	32	82.1	6.7	1874	32	1.67754	0.205043	218.071	0.3	0	0	0	0.3	0	0	0.8	0	0	0	29.8	0	0.3	0.3	0	0.8	0.3	1.1	41.3	1.4	4.1	0.3	0.8	0.8	1.1	1.1	0.8	0	0	1.4	0	0.3	0.8	0	0	0	0	0	0
RS14-BC02	35	36	75.7	6.7	1856	37	1.59704	0.20521	487.945	0.65	0	0	0.1	0.25	0.1	0.2	0.1	0	0	0	22.55	0	0.35	0	0	0.9	0.55	0.75	46.45	2.35	2.65	0.2	1.4	1.05	1.2	0.1	0.9	0.1	0.3	0.5	0	0.2	0.35	0	0	0	0	0.25	0
RS14-BC03	1	2	482	25	2008	0.2	1.82403	0.255391	233.927	0.15	0.15	0	0	0.3	0	0.15	0.3	0	0.15	0	14.25	0	0.3	0.3	0	0.55	0.45	0.95	52.75	3.85	2.8	0.15	2.25	1.8	0.95	0.15	0.55	0	0.55	0.45	0	0	0.65	0.3	0	0	0	0.25	0
RS14-BC03	7	8	313	18	1985	0.9	1.869	0.255538	235.74	0.3	0	0	0	0	0.3	0	0	0	0	0	13.3	0	0.9	0	0	0.6	0	2.9	57.4	0.6	4.6	0	0.6	1.4	1.2	0	0	0	0	0.9	0	0.3	0.6	0	0	0	0	0	0
RS14-BC03	13	14	186	12	1961	1.7	1.79503	0.248313	309.784	0.3	0	0	0	0.15	0	0.15	0	0	0.15	0	11.85	0	0.45	0	0	0.45	0	0.9	64.6	4	1.55	0.15	1.2	1.85	0.75	0.6	0.3	0	0	1.25	0	0.15	0.15	0.15	0	0	0	0.6	0
RS14-BC03	19	20	149.6	9.6	1938	2.4	1.84017	0.24735	295.685	0.3	0	0	0	0.3	0	0	0.3	0	0	0	13.5	0	0.3	0	0	0.9	0	0.3	63.2	1.5	3.2	0	0.3	2.4	0.6	0.3	0.3	0	0.3	0.3	0	0	0.3	0	0	0	0	0	0
RS14-BC03	25	26	116.4	8.3	1914	3.1	1.72488	0.222123	281.77	0.3	0	0	0	0.6	0	0	0	0	0.6	0	18.2	0	0.3	0	0.3	0.6	0.3	0.6	58.6	1.5	2.2	0	0.3	0.6	0.3	0.3	0.6	0	0.3	0.3	0	0.3	0.3	0	0	0	0	0	0
RS14-BC03	31	32	100.8	7.6	1890	3.9	1.70653	0.223098	222.712	0.3	0	0	0	0.3	0.3	0	0	0	0.3	0	12.4	0	0.3	0.3	0	1.4	0	1.1	57.1	4.8	2	0.3	0.3	1.4	1.1	0.3	0.3	0	0	0.6	0	0.3	0.3	0	0	0	0	0	0
RS14-BC03	37	38	92.8	7.2	1867	4.6	1.70175	0.239256	241.418	0.3	0	0	0	0	0	0	0.3	0	0.3	0	15.3	0	0.3	0	0	0.9	0	2	57.1	4.6	2.6	0.3	1.4	1.2	1.4	0	0.6	0	0.6	0.9	0	0	0.3	0	0	0	0	0	0
RS14-BC03	43	44	82.1	6.7	1843	5.3	1.50179	0.209654	273.139	0.3	0	0	0	0.3	0	0.3	0	0	0.3	0	11.7	0	0.6	0	0	0.6	0	0.9	58.4	2.1	1.8	0	0.9	3.3	1.5	0.6	0.3	0.3	0	0.3	0	0.3	0.6	0	0	0	0	0	0
RS14-BC04	1	2	293	17	2007	0.6	2.04686	0.300721	421.42	0.5	0.3	0	0	0.3	0	0	0	0	0.3	0	12.9	0	0	0.3	0	0.5	0.5	0.5	64.5	5.4	2.4	0.3	1.1	0	0.8	0.3	1.6	0	0	0.3	0	0	0.3	0	0	0	0	0	0
RS14-BC04	7	8	300	17	1981	3.2	1.76655	0.260376	224.377	0.3	0	0	0	0	0	0	0	0.3	0.6	0	10	0	0.3	0.3	0	1.7	0.6	0.6	58.9	2.6	2.3	0.3	0.3	1.7	0.3	1.7	1.7	0	0	0.3	0	0.3	0.3	0	0	0	0	0.3	0
RS14-BC04	15	16	144	10	1945	6.7	1.8353	0.260602	156.323	0.3	0	0	0	0	0	0.3	0	0	0	0	11.9	0	0.3	0	0	0.9	1.2	0.6	65.3	4	0	0.3	0.6	3	0.3	0	1.2	0	0	0.3	0	0.3	0.9	0	0	0	0	0	0
RS14-BC04	21	22	110.2	8.6	1919	9.2	2.01796	0.29597	192.028	0.3	0	0	0	0	0	0.3	0.5	0	0.5	0	14.4	0	0.3	0	0	0.5	0	0.8	60.8	3.8	1.8	0.3	0.5	2.5	0.5	0.3	0.8	0	0	0.3	0	0.3	0.3	0	0	0	0	0.8	0
RS14-BC04	29	30	97.9	7.3	1883	12.7	1.94983	0.284594	96.9133	1	0	0	0	0	0	0	0	0	0.3	0	14.8	0	0.3	0	0	0.6	1	0.6	56.8	1	1.6	0.3	0	0.6	0	0	1.9	0	0.3	1	0	0.6	0.3	0	0	0	0	1	0
RS14-BC04	35	36	82.8	7	1856	15.3	1.82521	0.270414	193.69	0.2	0	0	0	0	0	0	0.9	0	0.2	0	16.6	0	0.9	0	0	0.4	0.2	1.3	45.1	12.1	4.5	0.2	0.4	2.2	0.7	0	0.7	0.4	0.2	0.4	0.2	0.2	0.4	0.2	0	0	0	0.4	0
RS14-BC04	43	44	81	6.6	1821	18.7	2.06862	0.314601	142.66	0.3	0	0	0	0	0	0	0.6	0	0	0.3	21.6	0	0.3	0	0	2.3	0	1.2	52	1.5	1.2	0.6	0.6	1.5	1.2	0.6	0.6	0	0	0.3	0	0.3	0.3	0	0	0	0	0	0
RS14-BC04	49	50	79.7	6.5	1794	21.3	1.87558	0.270682	166.524	0.3	0	0	0	0.3	0	0	0.3	0	0	0	26.9	0	1.6	0.3	0	1.3	0.5	0.8	43.9	3.2	2.9	0	1.1	0.8	0	0.5	0.5	0	0.5	0	0.3	0	0.5	0	0	0	0	1.1	0
RS15-GC72	0	1					1.77048	0.253018	149.568	0.3	0	0	0	0	0.3	0	0.3	0.5	0.3	0	21.1	0	1	0	0	1.3	0.5	0	48	2.5	5.1	0.5	1.3	1	1.3	0.8	2.3	0	0	0.3	0	0	0.3	0	0	0	0	0.8	0
RS15-GC78	0	1					1.89517	0.283249	202.275	0.3	0	0	0	1	0	0	0	0	0	0	21.8	0	0	0.3	0	0.6	0	1.6	50.6	2.6	1	0	0.6	1.9	0.3	0.6	0.6	0	0.6	0.6	0	0	0.3	0	0	0	0	0	0
RS15-GC80	0	1					1.81649	0.26075	205.811	0.6	0	0	0	0.3	0.6	0.3	0	0	0	0	25.5	0	0.3	0	0	1.2	0	1.2	46	2.6	1.2	0	0.6	1.5	1.2	0.6	1.2	0.3	0	0.3	0	0.3	0.3	0	0	0	0	0	0
[truncated: 61 more columns]

## Sheet: Parameter table
Parameter Name	Unit	Principal Investigator	Method/Device
Depth, sediment, top (cm)	cm	VHLW
Depth, sediment, bottom (cm)	cm	VHLW
Polonium-210 (Bq/kg)	Bq/kg	VHLW	Alpha spectrometry
Polonium-210 (Bq/kg) Error ±	Bq/kg	VHLW	Alpha spectrometry
Age (years CE)	years CE	VHLW	Constant sedimentation rate lead dating model
Age (years CE) Error ±	years CE	VHLW	Constant sedimentation rate lead dating model
Total organic carbon (%)	%	VHLW	FlashSmart Elemental Analyzer Thermo Fisher Scientific
Total nitrogen (%)	%	VHLW	FlashSmart Elemental Analyzer Thermo Fisher Scientific
Diatom abundance (106 v gdw−1)	106 v gdw−1	VHLW	Olympus BH2 phase contrast photomicroscope
Actinocyclus actinochilus (%)	%	VHLW	Olympus BH2 phase contrast photomicroscope
Actinocyclus curvatulus (%)	%	VHLW	Olympus BH2 phase contrast photomicroscope
Actinocyclus cf. ehrenbergii (%)	%	VHLW	Olympus BH2 phase contrast photomicroscope
Actinocyclus sp. (%)	%	VHLW	Olympus BH2 phase contrast photomicroscope
Asteromphalus hookeri (%)	%	VHLW	Olympus BH2 phase contrast photomicroscope
Asteromphalus hyalinus (%)	%	VHLW	Olympus BH2 phase contrast photomicroscope
Asteromphalus parvalus (%)	%	VHLW	Olympus BH2 phase contrast photomicroscope
Centric sp. (%)	%	VHLW	Olympus BH2 phase contrast photomicroscope
Chaetoceros atlantica (%)	%	VHLW	Olympus BH2 phase contrast photomicroscope
Chaetoceros bulbosum (%)	%	VHLW	Olympus BH2 phase contrast photomicroscope
Chaetoceros cryophilum (%)	%	VHLW	Olympus BH2 phase contrast photomicroscope
Chaetoceros resting spores (%)	%	VHLW	Olympus BH2 phase contrast photomicroscope
Cocconeis fasciolata (%)	%	VHLW	Olympus BH2 phase contrast photomicroscope
Corethron cryophilum (%)	%	VHLW	Olympus BH2 phase contrast photomicroscope
Coscinodiscus oculus-iridis (%)	%	VHLW	Olympus BH2 phase contrast photomicroscope
Coscinodiscus sp. (%)	%	VHLW	Olympus BH2 phase contrast photomicroscope
Eucampia antartica var. intermedia (%)	%	VHLW	Olympus BH2 phase contrast photomicroscope
Eucampia antarctica var. terminalis (%)	%	VHLW	Olympus BH2 phase contrast photomicroscope
Entomoneis sp. (%)	%	VHLW	Olympus BH2 phase contrast photomicroscope
Fragilariopsis curta (%)	%	VHLW	Olympus BH2 phase contrast photomicroscope
Fragilariopsis cylindrus (%)	%	VHLW	Olympus BH2 phase contrast photomicroscope
Fragilariopsis cryophilic (%)	%	VHLW	Olympus BH2 phase contrast photomicroscope
Fragilariopsis kerguelensis (%)	%	VHLW	Olympus BH2 phase contrast photomicroscope
Fragilariopsis obliquecostata (%)	%	VHLW	Olympus BH2 phase contrast photomicroscope
Fragilariopsis rhombica (%)	%	VHLW	Olympus BH2 phase contrast photomicroscope
Fragilariopsis ritscheri (%)	%	VHLW	Olympus BH2 phase contrast photomicroscope
Fragilariopsis separanda (%)	%	VHLW	Olympus BH2 phase contrast photomicroscope
Fragilariopsis sublinearis (%)	%	VHLW	Olympus BH2 phase contrast photomicroscope
Fragilariopsis vanheurckii (%)	%	VHLW	Olympus BH2 phase contrast photomicroscope
Navicula directa (%)	%	VHLW	Olympus BH2 phase contrast photomicroscope
Nitzschia stellata (%)	%	VHLW	Olympus BH2 phase contrast photomicroscope
Odontella weissflogii (%)	%	VHLW	Olympus BH2 phase contrast photomicroscope
Pleurosigma directum (%)	%	VHLW	Olympus BH2 phase contrast photomicroscope
Porosira glacialis (%)	%	VHLW	Olympus BH2 phase contrast photomicroscope
Proboscia pseudodenticulata (%)	%	VHLW	Olympus BH2 phase contrast photomicroscope
Proboscia alata (%)	%	VHLW	Olympus BH2 phase contrast photomicroscope
Proboscia truncata (%)	%	VHLW	Olympus BH2 phase contrast photomicroscope
Proboscia inermis (%)	%	VHLW	Olympus BH2 phase contrast photomicroscope
Proboscia sp. (%)	%	VHLW	Olympus BH2 phase contrast photomicroscope
Pseudo-nitzschia lineola (%)	%	VHLW	Olympus BH2 phase contrast photomicroscope
Pseudo-nitzschia turgiduloides (%)	%	VHLW	Olympus BH2 phase contrast photomicroscope
Rhizosolenia antennata var. semispina (%)	%	VHLW	Olympus BH2 phase contrast photomicroscope
Rhizosolenia antennata f. antennata (%)	%	VHLW	Olympus BH2 phase contrast photomicroscope
Rhizosolenia sp. (%)	%	VHLW	Olympus BH2 phase contrast photomicroscope
Shionodiscus gracilis (%)	%	VHLW	Olympus BH2 phase contrast photomicroscope
Shionodiscus ritscheri (%)	%	VHLW	Olympus BH2 phase contrast photomicroscope
Shionodiscus trifultus (%)	%	VHLW	Olympus BH2 phase contrast photomicroscope
Stellarima microtrias (%)	%	VHLW	Olympus BH2 phase contrast photomicroscope
Synedropsis fragilis (%)	%	VHLW	Olympus BH2 phase contrast photomicroscope
Synedropsis hyperboreoides (%)	%	VHLW	Olympus BH2 phase contrast photomicroscope
Synedropsis recta (%)	%	VHLW	Olympus BH2 phase contrast photomicroscope
Thalassiosira antarctica cold (%)	%	VHLW	Olympus BH2 phase contrast photomicroscope
Thalassiosira lentiginosa (%)	%	VHLW	Olympus BH2 phase contrast photomicroscope
Thalassiosira maculata (%)	%	VHLW	Olympus BH2 phase contrast photomicroscope
Thalassiosira oliverana (%)	%	VHLW	Olympus BH2 phase contrast photomicroscope
Thalassiosira tumida (%)	%	VHLW	Olympus BH2 phase contrast photomicroscope
Thalassiothrix antarctica (%)	%	VHLW	Olympus BH2 phase contrast photomicroscope
Trichotoxon reinboldii (%)	%	VHLW	Olympus BH2 phase contrast photomicroscope
IPSO25 HBI diene (µg/g TOC)	µg/g TOC	VHLW	GC-MS; Agilent Technologies, model: 7890A and 5975C
Brassicasterol (µg/g TOC)	µg/g TOC	VHLW	GC-MS; Agilent Technologies, model: 7890A and 5975C
Dinosterol (µg/g TOC)	µg/g TOC	VHLW	GC-MS; Agilent Technologies, model: 7890A and 5975C
C12:0 (µg/g TOC)	µg/g TOC	VHLW	GC-MS; Agilent Technologies, model: 7890A and 5975C
Iso C13:0 (µg/g TOC)	µg/g TOC	VHLW	GC-MS; Agilent Technologies, model: 7890A and 5975C
Anteiso C13:0 (µg/g TOC)	µg/g TOC	VHLW	GC-MS; Agilent Technologies, model: 7890A and 5975C
C13:0 (µg/g TOC)	µg/g TOC	VHLW	GC-MS; Agilent Technologies, model: 7890A and 5975C
Iso C14:0 (µg/g TOC)	µg/g TOC	VHLW	GC-MS; Agilent Technologies, model: 7890A and 5975C
C14:1ω5 (µg/g TOC)	µg/g TOC	VHLW	GC-MS; Agilent Technologies, model: 7890A and 5975C
C14:0 (µg/g TOC)	µg/g TOC	VHLW	GC-MS; Agilent Technologies, model: 7890A and 5975C
Iso C15:0 (µg/g TOC)	µg/g TOC	VHLW	GC-MS; Agilent Technologies, model: 7890A and 5975C
Anteiso C15:0 (µg/g TOC)	µg/g TOC	VHLW	GC-MS; Agilent Technologies, model: 7890A and 5975C
C15:0 (µg/g TOC)	µg/g TOC	VHLW	GC-MS; Agilent Technologies, model: 7890A and 5975C
Iso C16:0 (µg/g TOC)	µg/g TOC	VHLW	GC-MS; Agilent Technologies, model: 7890A and 5975C
Anteiso C16:0 (µg/g TOC)	µg/g TOC	VHLW	GC-MS; Agilent Technologies, model: 7890A and 5975C
C16:1ω8 (µg/g TOC)	µg/g TOC	VHLW	GC-MS; Agilent Technologies, model: 7890A and 5975C
C16:1ω7 (µg/g TOC)	µg/g TOC	VHLW	GC-MS; Agilent Technologies, model: 7890A and 5975C
C16:1ω6 (µg/g TOC)	µg/g TOC	VHLW	GC-MS; Agilent Technologies, model: 7890A and 5975C
C16:1ω5 (µg/g TOC)	µg/g TOC	VHLW	GC-MS; Agilent Technologies, model: 7890A and 5975C
C16:0 (µg/g TOC)	µg/g TOC	VHLW	GC-MS; Agilent Technologies, model: 7890A and 5975C
Iso C17:0 (µg/g TOC)	µg/g TOC	VHLW	GC-MS; Agilent Technologies, model: 7890A and 5975C
Anteiso C17:0 (µg/g TOC)	µg/g TOC	VHLW	GC-MS; Agilent Technologies, model: 7890A and 5975C
C17:1ω8 (µg/g TOC)	µg/g TOC	VHLW	GC-MS; Agilent Technologies, model: 7890A and 5975C
C17:1ω7 (µg/g TOC)	µg/g TOC	VHLW	GC-MS; Agilent Technologies, model: 7890A and 5975C
C17:0 (µg/g TOC)	µg/g TOC	VHLW	GC-MS; Agilent Technologies, model: 7890A and 5975C
C18:2ω5,9 (µg/g TOC)	µg/g TOC	VHLW	GC-MS; Agilent Technologies, model: 7890A and 5975C
C18:1ω9 (µg/g TOC)	µg/g TOC	VHLW	GC-MS; Agilent Technologies, model: 7890A and 5975C
C18:1ω7 (µg/g TOC)	µg/g TOC	VHLW	GC-MS; Agilent Technologies, model: 7890A and 5975C
C18:1ω6 (µg/g TOC)	µg/g TOC	VHLW	GC-MS; Agilent Technologies, model: 7890A and 5975C
C18:1ω5 (µg/g TOC)	µg/g TOC	VHLW	GC-MS; Agilent Technologies, model: 7890A and 5975C
C18:0 (µg/g TOC)	µg/g TOC	VHLW	GC-MS; Agilent Technologies, model: 7890A and 5975C
C19:1ω8 (µg/g TOC)	µg/g TOC	VHLW	GC-MS; Agilent Technologies, model: 7890A and 5975C
C20:1ω9 (µg/g TOC)	µg/g TOC	VHLW	GC-MS; Agilent Technologies, model: 7890A and 5975C
C20:0 (µg/g TOC)	µg/g TOC	VHLW	GC-MS; Agilent Technologies, model: 7890A and 5975C
C21:0 (µg/g TOC)	µg/g TOC	VHLW	GC-MS; Agilent Technologies, model: 7890A and 5975C
C22:1ω9 (µg/g TOC)	µg/g TOC	VHLW	GC-MS; Agilent Technologies, model: 7890A and 5975C
C22:0 (µg/g TOC)	µg/g TOC	VHLW	GC-MS; Agilent Technologies, model: 7890A and 5975C
C23:0 (µg/g TOC)	µg/g TOC	VHLW	GC-MS; Agilent Technologies, model: 7890A and 5975C
C24:0 (µg/g TOC)	µg/g TOC	VHLW	GC-MS; Agilent Technologies, model: 7890A and 5975C
C25:0 (µg/g TOC)	µg/g TOC	VHLW	GC-MS; Agilent Technologies, model: 7890A and 5975C
C26:0 (µg/g TOC)	µg/g TOC	VHLW	GC-MS; Agilent Technologies, model: 7890A and 5975C
C28:0 (µg/g TOC)	µg/g TOC	VHLW	GC-MS; Agilent Technologies, model: 7890A and 5975C
C30:0 (µg/g TOC)	µg/g TOC	VHLW	GC-MS; Agilent Technologies, model: 7890A and 5975C
